# Supplementary material
Source: PubMed Central journal article supplement (PMC6070415)
Supplement: NIHMS953166-supplement-supplement_1.pdf [file NIHMS953166-supplement-supplement_1.pdf]

**SUPPLEMENTAL TABLES****Table S1.** Maternal sociodemographic characteristics among participants included in the analytic sample

| Maternal sociodemographic characteristics                    | Included in analytic sample, % (n=200) | Not included in analytic sample, % (n=808) | P, Chi square |
|--------------------------------------------------------------|----------------------------------------|--------------------------------------------|---------------|
| Maternal age at 2 <sup>nd</sup> trimester lead assessment, y |                                        |                                            | 0.21          |
| <25                                                          | 32%                                    | 44%                                        |               |
| 25 to <30                                                    | 36%                                    | 31%                                        |               |
| 30 to <35                                                    | 18%                                    | 18%                                        |               |
| ≥35                                                          | 15%                                    | 7%                                         |               |
| Maternal parity, number of previous pregnancies              |                                        |                                            | 0.20          |
| 0 or 1                                                       | 39%                                    | 38%                                        |               |
| 2                                                            | 34%                                    | 36%                                        |               |
| ≥3                                                           | 28%                                    | 26%                                        |               |
| Maternal education, y                                        |                                        |                                            | 0.21          |
| Did not complete secondary (<9)                              | 14%                                    | 12%                                        |               |
| Completed some high school (9 to <12)                        | 39%                                    | 40%                                        |               |
| Completed high school (12)                                   | 33%                                    | 32%                                        |               |
| Higher education (>12)                                       | 15%                                    | 16%                                        |               |

---

compared to participants not included in analytic sample

**Table S2.** Probability of menarche among Mexican schoolgirls according to prenatal Pb exposure (continuous variable)

| Prenatal lead exposure             | Current status model (Interval-censored) |                                               | Age at menarche model (Conventional Cox) |                                               |                                                                       |
|------------------------------------|------------------------------------------|-----------------------------------------------|------------------------------------------|-----------------------------------------------|-----------------------------------------------------------------------|
|                                    | Hazard ratio (95% CI) <sup>1</sup>       | Adjusted hazard ratio (95% CI) <sup>1,2</sup> | Hazard ratio (95% CI) <sup>3</sup>       | Adjusted hazard ratio (95% CI) <sup>2,3</sup> | Adjusted hazard ratio, <14.5 y at interview (95% CI) <sup>2,3,4</sup> |
| 1 <sup>st</sup> trimester, n = 195 |                                          |                                               |                                          |                                               |                                                                       |
| Continuous Pb, per µg/dL           | 0.98(0.93, 1.03)                         | 0.99(0.93, 1.04)                              | 1.01(0.97, 1.04)                         | 1.02(0.98, 1.06)                              | 0.99(0.92, 1.06)                                                      |
| P value                            | 0.55                                     | 0.61                                          | 0.65                                     | 0.32                                          | 0.79                                                                  |
| 2 <sup>nd</sup> trimester, n = 200 |                                          |                                               |                                          |                                               |                                                                       |
| Continuous Pb, per µg/dL           | 0.98(0.92, 1.03)                         | 0.98(0.91, 1.04)                              | 0.98(0.94, 1.02)                         | 1.00(0.95, 1.04)                              | 0.97(0.90, 1.04)                                                      |
| P value                            | 0.39                                     | 0.42                                          | 0.37                                     | 0.92                                          | 0.41                                                                  |
| 3 <sup>rd</sup> trimester, n = 187 |                                          |                                               |                                          |                                               |                                                                       |
| Continuous Pb, per µg/dL           | 0.98(0.93, 1.04)                         | 0.99(0.92, 1.05)                              | 1.00(0.96, 1.04)                         | 1.01(0.97, 1.05)                              | 0.99 (0.92, 1.06)                                                     |
| P value                            | 0.49                                     | 0.69                                          | 0.99                                     | 0.75                                          | 0.78                                                                  |

<sup>1</sup>From interval-censored Cox regression models, with status of menarche from birth through age during sexual maturation interview as the outcome

<sup>2</sup>Adjusted for maternal age, maternal parity, maternal education, and prenatal calcium treatment status

<sup>3</sup>From Cox regression models with self-reported age at menarche as the outcome

<sup>4</sup>Restricted sample sizes are 141, 138, and 133 for 1<sup>st</sup>, 2<sup>nd</sup>, and 3<sup>rd</sup> trimesters, respectively
